# Supplementary material
Source: Springer Nature journal article supplement (https://www.springermedizin.de/resource/supplementary/13045_2010_122_MOESM1_ESM.pdf/9660700)

clonal  
WM cells

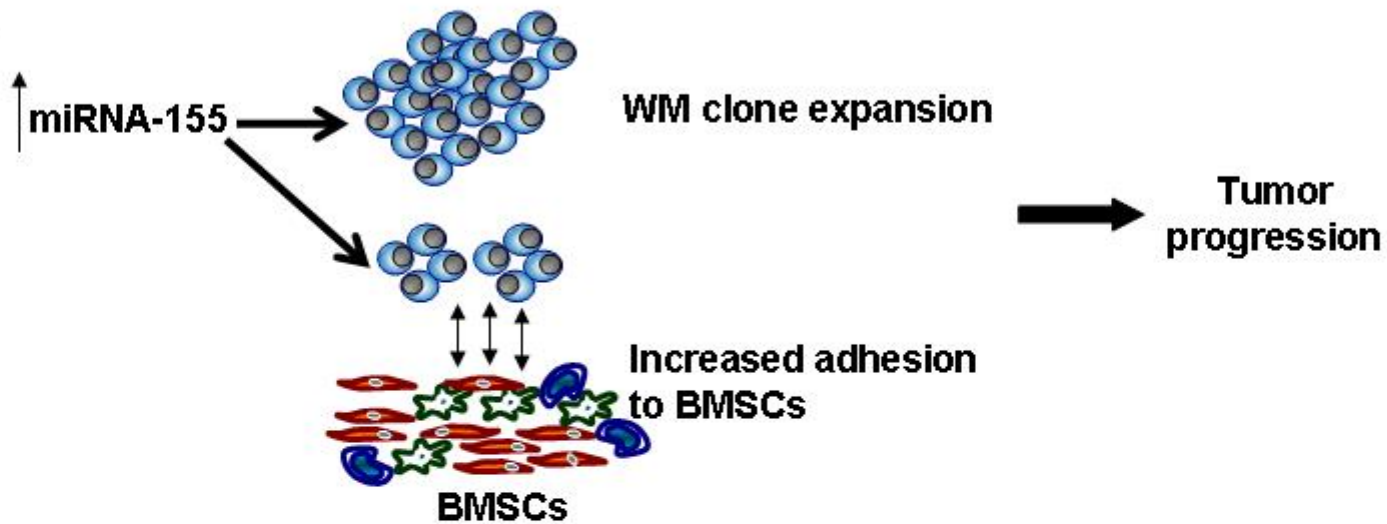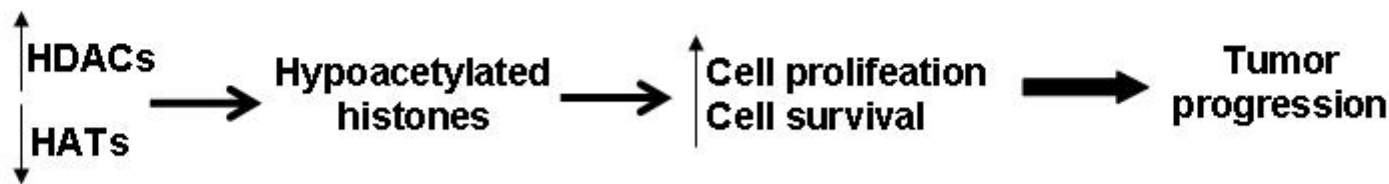

Supplement: MOESM1 [file 9660700]
